# Supplementary material for: Maximizing Polysaccharides and Phycoerythrin in Porphyridium purpureum via the Addition of Exogenous Compounds: A Response-Surface-Methodology Approach
Source: MDPI journal article supplement (doi:10.3390/md22030138), 2024-03-21
Supplement: s1 [file s1]

**Table S1** Analysis of variance for quadratic model for biomass concentration.

| Source         | Sum of Squares | df | Mean Square | F-value | p-value | Remark          |
|----------------|----------------|----|-------------|---------|---------|-----------------|
| Model          | 11.13          | 9  | 1.24        | 6.25    | 0.0123  | Significant     |
| A-CG           | 0.6272         | 1  | 0.6272      | 3.17    | 0.1183  | Significant     |
| B-MG           | 3.98           | 1  | 3.98        | 20.09   | 0.0029  |                 |
| C-BT           | 0.0685         | 1  | 0.0685      | 0.3458  | 0.575   |                 |
| AB             | 0.087          | 1  | 0.087       | 0.4397  | 0.5285  |                 |
| AC             | 0.9506         | 1  | 0.9506      | 4.8     | 0.0645  |                 |
| BC             | 0.002          | 1  | 0.002       | 0.0102  | 0.9223  |                 |
| A <sup>2</sup> | 0.0594         | 1  | 0.0594      | 0.3     | 0.6009  | Significant     |
| B <sup>2</sup> | 0.7208         | 1  | 0.7208      | 3.64    | 0.098   |                 |
| C <sup>2</sup> | 4.33           | 1  | 4.33        | 21.86   | 0.0023  |                 |
| Residual       | 1.39           | 7  | 0.1979      |         |         |                 |
| Lack of Fit    | 0.7383         | 3  | 0.2461      | 1.52    | 0.3384  | Not significant |
| Pure Error     | 0.6472         | 4  | 0.1618      |         |         |                 |
| Cor Total      | 12.51          | 16 |             |         |         |                 |

CG, calcium gluconate; MG, magnesium gluconate; BT, polypeptides.

**Table S2** Analysis of variance for quadratic model for phycoerythrin concentration.

| Source         | Sum of Squares | df | Mean Square | F-value | p-value | Remark          |
|----------------|----------------|----|-------------|---------|---------|-----------------|
| Model          | 3444.89        | 9  | 382.77      | 8.32    | 0.0054  | Significant     |
| A-CG           | 20.54          | 1  | 20.54       | 0.4466  | 0.5254  |                 |
| B-MG           | 5.78           | 1  | 5.78        | 0.1257  | 0.7334  |                 |
| C-BT           | 625.16         | 1  | 625.16      | 13.59   | 0.0078  | Significant     |
| AB             | 139            | 1  | 139         | 3.02    | 0.1257  |                 |
| AC             | 8.01           | 1  | 8.01        | 0.1741  | 0.689   |                 |
| BC             | 0.1089         | 1  | 0.1089      | 0.0024  | 0.9626  |                 |
| A <sup>2</sup> | 16.74          | 1  | 16.74       | 0.3639  | 0.5654  |                 |
| B <sup>2</sup> | 103.63         | 1  | 103.63      | 2.25    | 0.1771  |                 |
| C <sup>2</sup> | 2481.36        | 1  | 2481.36     | 53.94   | 0.0002  | Significant     |
| Residual       | 322            | 7  | 46          |         |         |                 |
| Lack of Fit    | 96.21          | 3  | 32.07       | 0.5681  | 0.6649  | Not significant |
| Pure Error     | 225.79         | 4  | 56.45       |         |         |                 |
| Cor Total      | 3766.88        | 16 |             |         |         |                 |

CG, calcium gluconate; MG, magnesium gluconate; BT, polypeptides.

**Table S3** Analysis of variance for quadratic model for polysaccharide concentration.

| Source         | Sum of Squares | df | Mean Square | F-value | p-value | Remark          |
|----------------|----------------|----|-------------|---------|---------|-----------------|
| Model          | 0.6249         | 9  | 0.0694      | 8.29    | 0.0054  | Significant     |
| A-CG           | 0.2016         | 1  | 0.2016      | 24.06   | 0.0017  | Significant     |
| B-MG           | 0.1431         | 1  | 0.1431      | 17.08   | 0.0044  | Significant     |
| C-BT           | 0.0221         | 1  | 0.0221      | 2.63    | 0.1488  |                 |
| AB             | 0.002          | 1  | 0.002       | 0.2417  | 0.638   |                 |
| AC             | 0.0484         | 1  | 0.0484      | 5.78    | 0.0472  | Significant     |
| BC             | 0.0625         | 1  | 0.0625      | 7.46    | 0.0293  | Significant     |
| A <sup>2</sup> | 0.0177         | 1  | 0.0177      | 2.11    | 0.1899  |                 |
| B <sup>2</sup> | 0.0235         | 1  | 0.0235      | 2.81    | 0.1377  |                 |
| C <sup>2</sup> | 0.0913         | 1  | 0.0913      | 10.9    | 0.0131  | Significant     |
| Residual       | 0.0587         | 7  | 0.0084      |         |         |                 |
| Lack of Fit    | 0.038          | 3  | 0.0127      | 2.45    | 0.2036  | Not significant |
| Pure Error     | 0.0207         | 4  | 0.0052      |         |         |                 |
| Cor Total      | 0.6836         | 16 |             |         |         |                 |

CG, calcium gluconate; MG, magnesium gluconate; BT, polypeptides.

**Table S4** Effect of phycoerythrin and polysaccharide contents in different exogenous substances.

| Types | Concentration<br>(g L <sup>-1</sup> ) | Phycoerythrin content<br>(mg g <sup>-1</sup> ) | Polysaccharide content<br>(g g <sup>-1</sup> ) |
|-------|---------------------------------------|------------------------------------------------|------------------------------------------------|
| CG    | 0                                     | 34.3±2.42                                      | 0.12±0.01                                      |
|       | 2                                     | 43.6±1.25                                      | 0.19±0.008                                     |
|       | 3                                     | 40.12±0.98                                     | 0.15±0.019                                     |
|       | 4                                     | 30.67±2.7                                      | 0.16±0.013                                     |
|       | 5                                     | 29.9±2.87                                      | 0.15±0.014                                     |
|       | 6                                     | 30.17±2.97                                     | 0.15±0.008                                     |
| MG    | 0                                     | 59.57±3.38                                     | 0.07±0.006                                     |
|       | 10                                    | 39.52±1.14                                     | 0.2±0.1                                        |
|       | 11                                    | 36.75±0.64                                     | 0.22±0.034                                     |
|       | 12                                    | 54.67±2.99                                     | 0.17±0.008                                     |
|       | 13                                    | 46.18±1.37                                     | 0.17±0.005                                     |
|       | 14                                    | 43.85±5.68                                     | 0.22±0.015                                     |
| BT    | 0                                     | 83.11±7.77                                     | 0.1±0.007                                      |
|       | 0.5                                   | 90.32±6.12                                     | 0.09±0.005                                     |
|       | 1                                     | 85.17±7.21                                     | 0.09±0.005                                     |
|       | 1.5                                   | 75.09±5.23                                     | 0.1±0.003                                      |
|       | 2                                     | 63.02±3.96                                     | 0.11±0.011                                     |
|       | 2.5                                   | 71.19±4.5                                      | 0.12±0.004                                     |

CG, calcium gluconate; MG, magnesium gluconate; BT, polypeptides.
